# Supplementary material for: Non-invasive Assessment of Fecal Stress Biomarkers in Hunting Dogs During Exercise and at Rest
Source: Front Vet Sci. 2020 Apr 21;7:126. doi: 10.3389/fvets.2020.00126 (PMC7186473; doi:10.3389/fvets.2020.00126)
Supplement: Supplementary file 1 [file Table_1.XLSX]

## Sheet: Statistics
Table S1. Results of adonis and ANOSIM statistics applied to ordination analysis based on weighted and unweighted UniFrac distance metrics (related to Figure 8A).
		adonis		ANOSIM
	Categories	R2	P value	R	P value
weighted UniFrac	T0vsT1	0.038	0.2	0.2739	0.001
	T0vsT2	0.068	0.04	0.1085	0.08
	T0vsT3	0.053	0.09	0.06901	0.2
	T1vsT2	0.019	0.7	0.03052	0.2
	T1vsT3	0.054	0.09	0.2013	0.004
	T2vsT3	0.025	0.5	-0.0192	0.5
		adonis		ANOSIM
	Categories	R2	P value	R	P value
unweighted UniFrac	T0vsT1	0.051	0.005	0.5573	0.0001
	T0vsT2	0.058	0.001	0.362	0.001
	T0vsT3	0.044	0.02	0.2791	0.004
	T1vsT2	0.033	0.2	0.02092	0.3
	T1vsT3	0.044	0.03	0.1883	0.02
	T2vsT3	0.024	0.8	-0.02709	0.6
